CLINICAL OBSERVATIONS ON THE USE OF AMIDONES  
FOR ANALGESIA \* †BENJAMIN H. ROBBINS, M.D. ‡  
*Nashville, Tenn.*

Received for publication June 17, 1948

SINCE the first of this century when it became evident that opium or its most active ingredient, morphine, produced undesirable effects, mainly addiction, in man upon repeated administration for the control of pain, numerous studies have been made to find a substitute for morphine which produced the desired effects of morphine without at the same time having addiction liabilities.

The most extensive of these studies were those supported by the National Research Council extending from 1928-1941 with Dr. Small as the chemist, Dr. Eddy as the pharmacologist, and Dr. Himmelsbach as the clinical investigator. Their excellent studies reported in four books of some 3000 pages produced metapon, from morphine, which is superior to morphine in relation to addiction liabilities (1).

In 1939 Eislaub and Schaumann prepared isonipecaine (demerol) in their attempts to develop new substances with actions like atropine (2, 3). This substance on careful pharmacologic studies and clinical investigation has proved to be a fair substitute for morphine with secondary atropine-like properties, but it also possesses addiction liabilities (4).

At the end of the recent war a team of investigators of the Technical Industrial Intelligence Committee found that German chemists had prepared a series of new organic chemicals during the war and that some of these were of great interest as therapeutic agents (5). One of these, amidone (dolophine, 10820) was later prepared in this country and has been under investigation at several places during the past two years (6, 7, 8). Recently the name methadon has been accepted by the Council of Pharmacy and Chemistry of the American Medical Association for this substance known chemically as 6-dimethyl-amino-4, 4-diphenyl-3-heptanone (9). In addition to amidone some of its isomers have been prepared and studied for their analgesic and toxic properties (10, 11).

Several reports of laboratory investigations as well as a few preliminary reports of clinical studies using d-l amidone have been made

\* Presented before the Joint Meeting of the American Society of Anesthesiologists, Inc. and the Southeastern Section, New Orleans, Louisiana, February 16, 1948.

† The data on l-Isoamidone have been added since the paper was presented.

‡ From the Departments of Anesthesiology and Pharmacology, Vanderbilt University School of Medicine, Nashville, Tenn.

recently (6, 7, 8). The reaction of the animal or man following the administration of this new drug is in the main quite similar to that following morphine (6, 7, 8).

During the past eighteen months we have been carrying out a clinical investigation of d,l-amidone, l-amidone, d,l-isoamidone and l-isoamidone for preanesthetic and postanesthetic analgesic medication in order to obtain an estimation of their possible place as substitutes for morphine.

From a chemical point of view the amidones are an entirely different type of substance than either morphine or isonipecaine. The structural formulas of amidone and isoamidone are given in figure 1.

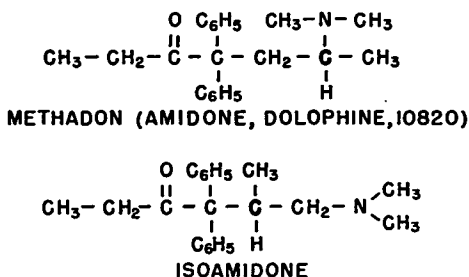

Fig. 1. Structural formulae of amidone and isoamidone.

With carbon-6 being asymmetric one has three possible types of amidone—d,l- or racemic, l- and d-. Likewise, with carbon-5 being asymmetric one has three possible types of isoamidone. The d-amidones have very weak analgesic properties. The analgesic activity of the d,l-amidone (methadon) and d,l-isoamidone is due almost wholly to the levo components (10, 11).

In our studies the hydrochloride salt of the racemic and levo forms of the two isomers was used to prepare the solutions. As a rule the d,l-compounds were made to a 1 per cent concentration and the l-compound to a 0.5 per cent concentration. All the drugs used were prepared by the Mallinckrodt Chemical Works and sent directly to us, except for some two hundred 1 cc. ampules of 1 per cent amidone that were put up by the S. E. Massengill Company, using the drug prepared by Mallinckrodt Chemical Works.

The drugs were given by subcutaneous or intramuscular injection in all instances.

The results of this investigation can be shown best in tabular form. Tables 1-4 summarize data on d,l-amidone. Tables 5-8 summarize data on l-amidone. Tables 9-12 summarize data on d,l-isoamidone. Tables 13-16 summarize data on l-isoamidone.

TABLE 1  
AGE AND SEX DISTRIBUTION OF PATIENTS RECEIVING D,L-AMIDONE

| Age, years | No. | Male | Female |
|------------|-----|------|--------|
| 11-20      | 7   | 3    | 4      |
| 21-30      | 43  | 8    | 35     |
| 31-40      | 67  | 9    | 58     |
| 41-50      | 76  | 17   | 59     |
| 51-60      | 44  | 14   | 30     |
| 61-70      | 24  | 11   | 13     |
| 71-80      | 10  | 5    | 5      |
| 81+        | 3   | 2    | 1      |
| Total      | 274 | 69   | 205    |

TABLE 2  
NUMBER AND SIZE OF DOSES OF D,L-AMIDONE

|                    |     |     |      |      |      |
|--------------------|-----|-----|------|------|------|
| Size, mg.          | 5.0 | 7.5 | 10.0 | 15.0 | 20.0 |
| Number             | 530 | 611 | 134  | 54   | 103  |
| Total doses = 1432 |     |     |      |      |      |

TABLE 3  
D,L-AMIDONE FOR PREANESTHETIC MEDICATION

|                            | Anesthetic Technic                          |                                      |                             |       |
|----------------------------|---------------------------------------------|--------------------------------------|-----------------------------|-------|
|                            | Pentothal<br>+ N <sub>2</sub> O<br>Patients | N <sub>2</sub> O + Ether<br>Patients | Spinal or Local<br>Patients | Total |
| Amidone 7.5 Mg. + Atropine | 40                                          | 56                                   | 3                           | 99    |
| Amidone 5. Mg. + Atropine  | 19                                          | 36                                   | 19                          | 74    |
| Total                      | 59                                          | 92                                   | 22                          | 173   |

TABLE 4  
SUMMARY OF PATIENTS RECEIVING D,L-AMIDONE ACCORDING TO TYPES OF DISEASE

| Disease                                  | Cases |
|------------------------------------------|-------|
| Vascular system.....                     | 10    |
| Skeletal system and extremities.....     | 20    |
| Face and neck.....                       | 5     |
| Breast.....                              | 9     |
| Abdominal wall or abdominal viscera..... | 51    |
| Thoracic cage or contents.....           | 24    |
| Kidney and urinary tract.....            | 14    |
| Female genital organs and tract.....     | 125   |
| Miscellaneous.....                       | 16    |
| Total.....                               | 274   |

TABLE 5  
AGE AND SEX DISTRIBUTION OF PATIENTS RECEIVING I-AMIDONE

| Age, years | No. | Male | Female |
|------------|-----|------|--------|
| 11-20      | 3   |      | 3      |
| 21-30      | 18  | 1    | 17     |
| 31-40      | 24  | 1    | 23     |
| 41-50      | 25  | 2    | 23     |
| 51-60      | 16  | 2    | 14     |
| 61-70      | 12  | 2    | 10     |
| 71-80      | 5   | 1    | 4      |
| Total      | 103 | 9    | 94     |

TABLE 6  
NUMBER AND SIZE OF DOSES OF I-AMIDONE

|                   |     |     |     |     |      |
|-------------------|-----|-----|-----|-----|------|
| Size, mg.         | 2.5 | 3.7 | 5.0 | 7.5 | 10.0 |
| Number            | 101 | 141 | 31  | 42  | 35   |
| Total doses = 350 |     |     |     |     |      |

TABLE 7  
I-AMIDONE FOR PREANESTHETIC MEDICATION

|                              | Anesthetic Technic                    |                |       |
|------------------------------|---------------------------------------|----------------|-------|
|                              | Pentothal + N <sub>2</sub> O Patients | Ether Patients | Total |
| I-Amidone 5.0 Mg. + atropine | 3                                     | 8              | 11    |
| I-Amidone 3.7 mg. + atropine | 9                                     | 16             | 25    |
| I-Amidone 2.5 mg. + atropine | 9                                     | 11             | 20    |
| Total                        | 21                                    | 35             | 56    |

TABLE 8  
SUMMARY OF PATIENTS RECEIVING I-AMIDONE ACCORDING TO TYPES OF DISEASE

| Disease                                  | Cases |
|------------------------------------------|-------|
| Vascular system.....                     | 2     |
| Skeletal system and extremities.....     | 4     |
| Face and neck.....                       | 3     |
| Breast.....                              | 3     |
| Abdominal wall or abdominal viscera..... | 16    |
| Thoracic cage or contents.....           | 11    |
| Urinary tract.....                       | 1     |
| Female genital organs and tract.....     | 63    |
| Miscellaneous.....                       | 2     |
| Total.....                               | 105   |

TABLE 9  
AGE AND SEX DISTRIBUTION OF PATIENTS RECEIVING D,L-ISOAMIDONE

| Age, years | No. | Male | Female |
|------------|-----|------|--------|
| 11-20      | 3   |      | 3      |
| 21-30      | 18  | 3    | 15     |
| 31-40      | 33  | 6    | 27     |
| 41-50      | 25  | 3    | 22     |
| 51-60      | 21  | 5    | 16     |
| 61-70      | 7   | 1    | 6      |
| 71-80      | 3   | 3    |        |
| Total      | 110 | 21   | 89     |

TABLE 10  
NUMBER AND SIZE OF DOSES OF D,L-ISOAMIDONE

|                   |     |     |      |      |
|-------------------|-----|-----|------|------|
| Size, mg.         | 5.0 | 7.5 | 10.0 | 15.0 |
| Number            | 42  | 37  | 269  | 18   |
| Total doses = 366 |     |     |      |      |

TABLE 11  
D,L-ISOAMIDONE FOR PREANESTHETIC MEDICATION

|                                    | Anesthetic Technic                    |                |       |
|------------------------------------|---------------------------------------|----------------|-------|
|                                    | Pentothal + N <sub>2</sub> O Patients | Ether Patients | Total |
| d,l-Isoamidone 15.0 mg. + atropine |                                       | 3              | 3     |
| d,l-Isoamidone 10.0 mg. + atropine | 14                                    | 41             | 55    |
| d,l-Isoamidone 7.5 mg. + atropine  | 1                                     | 5              | 6     |
| Total                              | 15                                    | 49             | 64    |

TABLE 12  
SUMMARY OF PATIENTS RECEIVING D,L-ISOAMIDONE ACCORDING TO TYPES OF DISEASE

| Disease                                  | Cases |
|------------------------------------------|-------|
| Vascular system.....                     | 2     |
| Skeletal system and extremities.....     | 7     |
| Breast.....                              | 2     |
| Abdominal wall or abdominal viscera..... | 15    |
| Thoracic cage or contents.....           | 6     |
| Urinary tract.....                       | 7     |
| Female genital organs and tract.....     | 60    |
| Miscellaneous.....                       | 11    |
| Total.....                               | 110   |

TABLE 13  
AGE AND SEX DISTRIBUTION OF PATIENTS RECEIVING I-ISOAMIDONE

| Age, years | No. | Male | Female |
|------------|-----|------|--------|
| 11-20      | 2   | 1    | 1      |
| 21-30      | 29  | 1    | 28     |
| 31-40      | 28  | —    | 28     |
| 41-50      | 29  | 1    | 28     |
| 51-60      | 27  | 1    | 26     |
| 61-70      | 11  | 2    | 9      |
| 71-80      | 1   | —    | 1      |
| Total      | 127 | 6    | 121    |

TABLE 14  
NUMBER AND SIZE OF DOSES OF I-ISOAMIDONE

|           |                   |     |      |      |      |
|-----------|-------------------|-----|------|------|------|
| Size, mg. | 5.0               | 7.5 | 10.0 | 15.0 | 20.0 |
| Number    | 140               | 237 | 93   | 9    | 10   |
|           | Total doses = 489 |     |      |      |      |

TABLE 15  
I-ISOAMIDONE FOR PREANESTHETIC MEDICATION

|                                 | Anesthetic Technic                    |                |       |
|---------------------------------|---------------------------------------|----------------|-------|
|                                 | Pentothal + N <sub>2</sub> O Patients | Ether Patients | Total |
| I-Isoamidone 7.5 mg. + atropine | 22                                    | 23             | 45    |
| I-Isoamidone 5.0 mg. + atropine | 15                                    | 22             | 37    |
| Total                           | 37                                    | 45             | 82    |

TABLE 16  
SUMMARY OF PATIENTS RECEIVING I-ISOAMIDONE ACCORDING TO TYPES OF DISEASE

| Disease                                  | Cases |
|------------------------------------------|-------|
| Vascular system.....                     | 1     |
| Skeletal system and extremities.....     | 7     |
| Head and neck.....                       | 2     |
| Abdominal wall or abdominal viscera..... | 14    |
| Thoracic cage or contents.....           | 4     |
| Urinary tract.....                       | 5     |
| Female genital organs and tract.....     | 91    |
| Miscellaneous.....                       | 3     |
| Total.....                               | 127   |

TABLE 17  
 PATIENTS IN WHOM AMIDONES DID NOT PRODUCE  
 SUFFICIENT POSTOPERATIVE ANALGESIA

| Age, years | Sex | Operation                          | Postop. Sedation |        | Changed to: |        |
|------------|-----|------------------------------------|------------------|--------|-------------|--------|
|            |     |                                    | Type             | Amount | Type        | Amount |
| 61         | F   | Vaginal Hysterectomy               | d,l-Amidone      | 7.5    | Morphine    | 10     |
| 35         | F   | Abdominal Hysterectomy             | d,l-Amidone      | 5.0    | Morphine    | 8      |
| 83         | M   | Amputation of Thigh                | d,l-Amidone      | 7.5    | Morphine    | 8      |
| 27         | F   | Fracture Cast                      | d,l-Amidone      | 7.5    | Morphine    | 8      |
| 35         | M   | Appendectomy                       | d,l-Amidone      | 7.5    | Morphine    | 10     |
| 39         | M   | Hernia                             | d,l-Amidone      | 7.5    | Morphine    | 10     |
| 47         | M   | Exploratory Laparotomy<br>Gun Shot | d,l-Amidone      | 7.5    | Morphine    | 10     |
| 47         | F   | Resection of Rectum                | d,l-Amidone      | 5.0    | Morphine    | 10     |
| 30         | M   | Spinal Fusion                      | d,l-Amidone      | 7.5    | Morphine    | 10     |
| 27         | M   | Ventral Hernia                     | d,l-Amidone      | 7.5    | Morphine    | 10     |
| 34         | F   | Hernia                             | l-Amidone        | 3.7    | Dilaudid    | 2      |
| 75         | F   | Cholecystectomy                    | l-Amidone        | 3.7    | Morphine    | 10     |
| 68         | F   | Resection of Rectum                | l-Amidone        | 2.5    | Morphine    | 8      |
| 32         | F   | Subcutaneous Tumor                 | l-Amidone        | 2.5    | Morphine    | 10     |
| 51         | M   | Lobectomy                          | l-Amidone        | 2.5    | Morphine    | 10     |
| 48         | F   | Dilatation and Curettage, radium   | l-Amidone        | 3.7    | Morphine    | 10     |
| 40         | F   | Abdominal Hysterectomy             | l-Amidone        | 3.7    | Morphine    | 10     |
| 44         | F   | Abdominal Hysterectomy             | l-Amidone        | 2.5    | Morphine    | 10     |
| 46         | F   | Abdominal Hysterectomy             | l-Amidone        | 2.5    | Morphine    | 10     |
| 30         | M   | Osteotomy Knee                     | d,l-Isoamidone   | 10.0   | Morphine    | 10     |
| 32         | M   | Lumbar Disk                        | d,l-Isoamidone   | 15.0   | Morphine    | 15     |
| 36         | F   | Spinal Fusion                      | d,l-Isoamidone   | 10.0   | Morphine    | 8      |
| 38         | M   | Gun Shot Abdominal                 | d,l-Isoamidone   | 10.0   | Morphine    | 10     |
| 35         | F   | Abdominal Hysterectomy             | d,l-Isoamidone   | 10.0   | Morphine    | 10     |
| 40         | M   | Sympathectomy                      | d,l-Isoamidone   | 7.5    | Morphine    | 10     |
| 36         | F   | Spinal Fusion                      | d,l-Isoamidone   | 10.0   | Morphine    | 10     |
| 50         | F   | Vaginal Hysterectomy               | d,l-Isoamidone   | 5.0    | Codeine     | 65     |
| 45         | F   | Sympathectomy                      | l-Isoamidone     | 10.0   | Morphine    | 10     |
| 52         | M   | Spinal Fusion                      | l-Isoamidone     | 7.5    | Morphine    | 15     |
| 67         | M   | Gastric Resection                  | l-Isoamidone     | 7.5    | Morphine    | 10     |
| 25         | M   | Thoracoplasty                      | l-Isoamidone     | 10.0   | Morphine    | 10     |
| 25         | F   | Vaginal Plastic                    | l-Isoamidone     | 7.5    | Morphine    | 10     |
| 22         | F   | Excision Ovarian Cyst              | l-Isoamidone     | 7.5    | Morphine    | 10     |
| 54         | F   | Vaginal Hysterectomy               | l-Isoamidone     | 5.0    | Morphine    | 10     |
| 44         | F   | Abdominal Hysterectomy             | l-Isoamidone     | 7.5    | Morphine    | 10     |
| 34         | F   | Abdominal Hysterectomy             | l-Isoamidone     | 7.5    | Morphine    | 10     |

The use of the different size doses of d,l-amidone (table 2) does not reflect a true frequency-dose-size curve, because the 10, 15 and 20 mg. doses were given 10, 54 and 100 times respectively to one individual. This individual weighed an average of 275 pounds during his stay in the hospital. This same individual accounted for 24 and 35 doses, respectively, of the 7.5 and 10 mg. size doses of l-amidone, reported in table 6.

## AMIDONES FOR PREANESTHETIC MEDICATION

d,l-Amidone, l-amidone, d,l-isoamidone or l-isoamidone was used as preanesthetic medication in place of morphine in 375 cases. In no instance was it found necessary to give a supplemental dose of morphine because of anxiety. In only one instance was there nausea with attempt at vomiting before the anesthetic was started.

In 2 individuals who received 5 mg. doses of l-amidone and one small individual who received 10 mg. of d,l-isoamidone there was a depression of respiration so that the periods of induction of anesthesia were greatly prolonged; in the remaining 217 patients who were given nitrous oxide-oxygen-ether, the induction was as rapid as would have been expected after morphine.

There is one striking point of difference in action between the amidones and morphine in patients under ether anesthesia, and that is in relation to the size of the pupil. With morphine there is a definite pattern in the change of the size of the pupil and reaction to light which is of value in estimating the plane of surgical anesthesia, whereas after administration of the amidones the pupil is usually larger than normal throughout all planes and does not react to light in the way that it does after morphine. This difference must be taken into consideration when the size of the pupil and its reaction to light are used in estimating the planes of anesthesia.

## AMIDONES FOR POSTANESTHETIC ANALGESIA

In 385 cases in which amidones were ordered for postanesthetic analgesia, it was necessary to give morphine in 36 instances during the first forty-eight hours because amidones in the amounts ordered did not give sufficient relief of pain; these failures are listed in table 13. In the remaining 349 cases analgesia was satisfactory.

The infrequency of nausea and the lack of hypnotic effects of amidones were the most frequently noted differences from morphine in comments from the nurses in charge of the wards.

## MISCELLANEOUS COMMENTS

Amidone was used in 5 cases of morphine, codeine or isonipeacaine addiction. In each instance it was possible to change to amidone without signs or symptoms of withdrawal. Amidone satisfied the addiction. In 4 cases the amidone was gradually withdrawn over a period of seven to ten days with success. In the fifth case the drug was stopped abruptly without the onset of withdrawal signs or symptoms.

In 2 patients who received 3 to 6 doses daily for a total of 126 and 215 doses no tolerance to the drug was observed.

## SUMMARY

d,l-Amidone, l-amidone, d,l-isoamidone or l-isoamidone has been given to 614 patients for a total of 2637 doses.



These drugs have been satisfactory in all instances when used for preoperative analgesia and in about 90 per cent of the cases when used for postoperative analgesia.

l-Amidone, 3.7 mg., d,l-amidone, 7.5 mg., d,l-isoamidone, 10 to 12 mg., or l-isoamidone, 7.5 mg., produces analgesia of the same degree and duration as 10 mg. morphine.

Nausea and hypnotic effects are very rarely observed following the use of the drugs in the doses listed.

#### REFERENCES

- (a) Small, L. F., and Lutz, R. E.: *Chemistry of the Opium Alkaloids*, U. S. Pub. Health Reports: Supplement No. 103, 1932. (b) Kruger, H.; Eddy, N. B., and Sumwalt, N.: *The Pharmacology of the Opium Alkaloids: Parts 1 and 2*, U. S. Pub. Health Reports: Supplement No. 165, 1941, 1943. (c) National Research Council: *Report of the Committee on Drug Addiction: Collected Reprints 1929-1941*.
- Von Eislaub, O., and Schaumann, O.: Dalantin, ein neuartiges spasmolytikum und analgetikum, *Deut. med. Wochschr.* 65: 967-968 (Juni) 1939.
- Schaumann, O.: Über eine neue Klasse von Verbindungen mit spasmolytischer unter zentral analgetischer wirksamkeit unter besonderer, *Arch. f. Exper. Path. u. Pharmacol.* 196: 109-136 (Oct.) 1940.
- (a) Anslinger, H. J.: Demerol: Case Histories involving Addiction to Demerol, *J. A. M. A.* 132: 43-44 (Sept. 7) 1946. (b) Wieder, H.: Addiction to Meperidine Hydrochloride (Demerol Hydrochloride), *J. A. M. A.* 132: 1066-1068 (Dec. 28) 1946.
- Kleiderer, E. C.; Rice, J. B.; Conquest, V., and Williams, J. H.: *Pharmaceutical Activities at the I. G. Farbenindustrie Plant, Hackst am Main*, Report No. 981, Office Publication Board, Dept. of Commerce, Washington, D. C.
- Scott, C. C., and Chen, K. K.: The Action of 1,1-Diphenyl-1-(dimethylamino isopropyl)-Butanone-2; a Potent Analgesic Agent, *J. Pharmacol. & Exper. Therap.* 87: 63-71 (May) 1946.
- Kirehhof, A. C., and David, A. N.: Clinical Trial of a New Synthetic Heptanone Analgesic (Dolophine). Preliminary Report. *West. J. Surg.* 55: 183-186 (Mar.) 1947.
- Christensen, E. M., and Gross, E. G.: A Comparison of the Analgesic Effects in Human Subjects of 6-Dimethyl Amino-4, 4-Diphenyl-3-Heptanone (AN-148), Morphine and Meperidine (Demerol), and the Relative Efficiency of AN-148 for Preoperative and Postoperative Use, *J. A. M. A.*, 137: 594-599 (June 12) 1948.
- J. A. M. A.* 134: 1483, No. 17 (Aug. 23) 1947.
- Jenney, Elizabeth, and Pfeiffer, C. G.: Comparative Analgesic and Toxic Effects of the Optical Isomers of Methadon and Isomethadon, *Federation Proc.* 7: 231 (Mar.) 1948.
- Denton, Jane E.; Straus, O. H.; Waddell, W. E., and Beecher, H. K.: A Comparison of the Side Actions and Analgesic Effects of Morphine, Amidone and its Isomers in Man, *Federation Proc.* 7: 214 (Mar.) 1948.

---

Bindings for Volumes 1, 2, 3, 4, 5, 6, 7, 8 and 9 of ANESTHESIOLOGY are available in green cloth (buckram) with gold lettering (price \$2.00 per volume; 15 cents extra for name), or in yellow cloth with black lettering (price \$1.50 per volume). Journals to be bound should be sent, together with the Index, to Headquarters of The American Society of Anesthesiologists, Inc., Room 1503, 745 Fifth Avenue, New York 22, N. Y.
